# Supplementary material
Source: PubMed Central journal article supplement (PMC7163153)
Supplement: JVI.01855-19-s0001.pdf [file JVI.01855-19-s0001.pdf]

**Supplementary Movie 1.** EM map and fit of model to EM map for one single icosahedral protomer.
